# Supplementary material
Source: publisher figshare collection journal article supplement (https://acs.figshare.com/ndownloader/files/4480858)
Supplement: Supplementary file 1 [file 4480858]

data_2
 
_audit_creation_method            SHELXL-97
_chemical_name_systematic
;
 ?
;
_chemical_name_common             "2,5-dibromo-3-\b-styrylthiophene"
_chemical_melting_point           ?
_chemical_formula_moiety          "C12 H8 Br2 S"
_chemical_formula_sum
 'C12 H8 Br2 S'
_chemical_formula_weight          344.06
 
loop_
 _atom_type_symbol
 _atom_type_description
 _atom_type_scat_dispersion_real
 _atom_type_scat_dispersion_imag
 _atom_type_scat_source
 'C'  'C'   0.0033   0.0016
 'International Tables Vol C Tables 4.2.6.8 and 6.1.1.4'
 'H'  'H'   0.0000   0.0000
 'International Tables Vol C Tables 4.2.6.8 and 6.1.1.4'
 'Br'  'Br'  -0.2901   2.4595
 'International Tables Vol C Tables 4.2.6.8 and 6.1.1.4'
 'S'  'S'   0.1246   0.1234
 'International Tables Vol C Tables 4.2.6.8 and 6.1.1.4'
 
_symmetry_cell_setting            monoclinic
_symmetry_space_group_name_H-M    Pc
 
loop_
 _symmetry_equiv_pos_as_xyz
 'x, y, z'
 'x, -y, z+1/2'
 
_cell_length_a                    3.9416(5)
_cell_length_b                    14.6497(18)
_cell_length_c                    9.9791(13)
_cell_angle_alpha                 90.00
_cell_angle_beta                  97.043(2)
_cell_angle_gamma                 90.00
_cell_volume                      571.88(13)
_cell_formula_units_Z             2
_cell_measurement_temperature     100(2)
_cell_measurement_reflns_used           2312
_cell_measurement_theta_max             30.85
_cell_measurement_theta_min             2.48
 
_exptl_crystal_description              plate
_exptl_crystal_colour                   colourless
_exptl_crystal_size_max                 0.4
_exptl_crystal_size_mid                 0.32
_exptl_crystal_size_min                 0.1
_exptl_crystal_density_meas       ?
_exptl_crystal_density_diffrn     1.998
_exptl_crystal_density_method     'not measured'
_exptl_crystal_F_000              332
_exptl_absorpt_coefficient_mu     7.231
_exptl_absorpt_correction_type    "multi-scan"
_exptl_absorpt_correction_T_min   0.112
_exptl_absorpt_correction_T_max   0.219
_exptl_absorpt_process_details    "Bruker SADABS 2008/1"
 
_exptl_special_details
;
 ?
;
 
_diffrn_ambient_temperature       100(2)
_diffrn_radiation_wavelength      0.71073
_diffrn_radiation_type            MoK\a
_diffrn_radiation_source          'fine-focus sealed tube'
_diffrn_radiation_monochromator   graphite
_diffrn_measurement_device_type   "Bruker APEX-II on four-circle goniometer"
_diffrn_measurement_method        "\w-scans"
_diffrn_detector_area_resol_mean  .
_diffrn_standards_number          .
_diffrn_standards_interval_count  .
_diffrn_standards_interval_time   .
_diffrn_standards_decay_%         .
_diffrn_reflns_number             3487
_diffrn_reflns_av_R_equivalents   0.0224
_diffrn_reflns_av_sigmaI/netI     0.0566
_diffrn_reflns_limit_h_min        -5
_diffrn_reflns_limit_h_max        5
_diffrn_reflns_limit_k_min        -21
_diffrn_reflns_limit_k_max        14
_diffrn_reflns_limit_l_min        -14
_diffrn_reflns_limit_l_max        14
_diffrn_reflns_theta_min          1.39
_diffrn_reflns_theta_max          31.33
_reflns_number_total              2500
_reflns_number_gt                 2378
_reflns_threshold_expression      >2sigma(I)
 
_computing_data_collection        "Bruker SAINT"
_computing_cell_refinement        "Bruker SAINT"
_computing_data_reduction         "Bruker SAINT"
_computing_structure_solution     "SHELXS-97 (Sheldrick, 2008)"
_computing_structure_refinement   'SHELXL-97 (Sheldrick, 2008)'
_computing_molecular_graphics     "Mercury, ORTEP-III for Windows"
_computing_publication_material   "WinGX,PLATON "
 
_refine_special_details
;
 Refinement of F^2^ against ALL reflections.  The weighted R-factor wR and
 goodness of fit S are based on F^2^, conventional R-factors R are based
 on F, with F set to zero for negative F^2^. The threshold expression of
 F^2^ > 2sigma(F^2^) is used only for calculating R-factors(gt) etc. and is
 not relevant to the choice of reflections for refinement.  R-factors based
 on F^2^ are statistically about twice as large as those based on F, and R-
 factors based on ALL data will be even larger.
;
 
_refine_ls_structure_factor_coef  Fsqd
_refine_ls_matrix_type            full
_refine_ls_weighting_scheme       calc
_refine_ls_weighting_details
 'calc w=1/[\s^2^(Fo^2^)+(0.0510P)^2^+0.0000P] where P=(Fo^2^+2Fc^2^)/3'
_atom_sites_solution_primary      direct
_atom_sites_solution_secondary    difmap
_atom_sites_solution_hydrogens    geom
_refine_ls_hydrogen_treatment     constr
_refine_ls_extinction_method      none
_refine_ls_extinction_coef        ?
_refine_ls_abs_structure_details
 'Flack H D (1983), Acta Cryst. A39, 876-881'
_refine_ls_abs_structure_Flack    0.056(13)
_refine_ls_number_reflns          2500
_refine_ls_number_parameters      136
_refine_ls_number_restraints      2
_refine_ls_R_factor_all           0.0400
_refine_ls_R_factor_gt            0.0380
_refine_ls_wR_factor_ref          0.0903
_refine_ls_wR_factor_gt           0.0896
_refine_ls_goodness_of_fit_ref    1.045
_refine_ls_restrained_S_all       1.044
_refine_ls_shift/su_max           0.007
_refine_ls_shift/su_mean          0.001
 
loop_
 _atom_site_label
 _atom_site_type_symbol
 _atom_site_fract_x
 _atom_site_fract_y
 _atom_site_fract_z
 _atom_site_U_iso_or_equiv
 _atom_site_adp_type
 _atom_site_occupancy
 _atom_site_symmetry_multiplicity
 _atom_site_calc_flag
 _atom_site_refinement_flags
 _atom_site_disorder_assembly
 _atom_site_disorder_group
C12 C -0.0118(14) 0.9210(4) 0.0010(5) 0.0177(9) Uani 1 1 d . . .
H12 H -0.1445 0.9171 -0.0825 0.021 Uiso 1 1 calc R . .
C13 C 0.0532(12) 0.8433(3) 0.0808(5) 0.0156(9) Uani 1 1 d . . .
H13 H -0.0397 0.7876 0.0504 0.019 Uiso 1 1 calc R . .
Br1 Br 0.46787(10) 0.39010(3) 0.49682(6) 0.01830(12) Uani 1 1 d . . .
Br2 Br 0.96557(10) 0.75891(3) 0.71055(5) 0.01590(12) Uani 1 1 d . . .
S3 S 0.8028(3) 0.55330(8) 0.66355(12) 0.0140(2) Uani 1 1 d . . .
C4 C 0.4687(13) 0.5818(3) 0.4277(5) 0.0136(8) Uani 1 1 d . . .
H4 H 0.3408 0.5722 0.3442 0.016 Uiso 1 1 calc R . .
C2 C 0.7678(12) 0.6631(3) 0.6035(5) 0.0137(8) Uani 1 1 d . . .
C10 C 0.3257(12) 1.0093(3) 0.1703(5) 0.0161(9) Uani 1 1 d . . .
H10 H 0.4168 1.0652 0.2007 0.019 Uiso 1 1 calc R . .
C5 C 0.5681(11) 0.5136(3) 0.5168(5) 0.0129(9) Uani 1 1 d . . .
C3 C 0.5838(11) 0.6708(3) 0.4771(5) 0.0133(8) Uani 1 1 d . . .
C6 C 0.5196(12) 0.7561(3) 0.4040(5) 0.0147(9) Uani 1 1 d . . .
H6 H 0.6242 0.8086 0.4417 0.018 Uiso 1 1 calc R . .
C7 C 0.3186(12) 0.7641(3) 0.2854(5) 0.0133(8) Uani 1 1 d . . .
H7 H 0.2090 0.7114 0.2507 0.016 Uiso 1 1 calc R . .
C9 C 0.3937(12) 0.9327(3) 0.2481(5) 0.0139(8) Uani 1 1 d . . .
H9 H 0.5332 0.9372 0.3301 0.017 Uiso 1 1 calc R . .
C8 C 0.2560(11) 0.8479(3) 0.2059(5) 0.0127(8) Uani 1 1 d . . .
C11 C 0.1231(13) 1.0042(3) 0.0473(5) 0.0161(9) Uani 1 1 d . . .
H11 H 0.0773 1.0566 -0.0045 0.019 Uiso 1 1 calc R . .
 
loop_
 _atom_site_aniso_label
 _atom_site_aniso_U_11
 _atom_site_aniso_U_22
 _atom_site_aniso_U_33
 _atom_site_aniso_U_23
 _atom_site_aniso_U_13
 _atom_site_aniso_U_12
C12 0.019(2) 0.019(2) 0.0144(19) -0.0009(19) -0.0003(17) 0.003(2)
C13 0.017(2) 0.011(2) 0.019(2) -0.0014(17) 0.0016(17) 0.0019(16)
Br1 0.0199(2) 0.0090(2) 0.0265(2) 0.00051(18) 0.00490(17) -0.00226(18)
Br2 0.01581(19) 0.0115(2) 0.0192(2) -0.00251(18) -0.00228(15) -0.00081(18)
S3 0.0145(5) 0.0115(5) 0.0156(5) 0.0017(4) 0.0011(4) 0.0005(4)
C4 0.0156(19) 0.008(2) 0.016(2) 0.0009(16) -0.0013(16) -0.0023(17)
C2 0.0143(19) 0.009(2) 0.018(2) -0.0012(16) 0.0031(17) -0.0001(16)
C10 0.015(2) 0.011(2) 0.022(2) 0.0002(18) 0.0030(18) 0.0003(17)
C5 0.0150(19) 0.007(2) 0.017(2) -0.0022(15) 0.0026(17) -0.0047(15)
C3 0.0113(18) 0.011(2) 0.017(2) -0.0007(16) 0.0020(16) 0.0002(15)
C6 0.015(2) 0.009(2) 0.020(2) -0.0016(16) 0.0034(18) 0.0007(15)
C7 0.0144(19) 0.010(2) 0.016(2) -0.0011(15) 0.0021(17) -0.0021(16)
C9 0.0150(19) 0.012(2) 0.0139(19) 0.0003(16) -0.0008(16) 0.0003(16)
C8 0.0123(18) 0.009(2) 0.017(2) 0.0003(15) 0.0041(16) 0.0019(15)
C11 0.018(2) 0.011(2) 0.020(2) 0.0049(18) 0.0055(18) 0.0047(18)
 
_geom_special_details
;
 All esds (except the esd in the dihedral angle between two l.s. planes)
 are estimated using the full covariance matrix.  The cell esds are taken
 into account individually in the estimation of esds in distances, angles
 and torsion angles; correlations between esds in cell parameters are only
 used when they are defined by crystal symmetry.  An approximate (isotropic)
 treatment of cell esds is used for estimating esds involving l.s. planes.
;
 
loop_
 _geom_bond_atom_site_label_1
 _geom_bond_atom_site_label_2
 _geom_bond_distance
 _geom_bond_site_symmetry_2
 _geom_bond_publ_flag
C12 C11 1.385(7) . ?
C12 C13 1.395(7) . ?
C12 H12 0.9300 . ?
C13 C8 1.399(6) . ?
C13 H13 0.9300 . ?
Br1 C5 1.857(5) . ?
Br2 C2 1.874(5) . ?
S3 C2 1.716(5) . ?
S3 C5 1.734(5) . ?
C4 C5 1.363(6) . ?
C4 C3 1.447(7) . ?
C4 H4 0.9300 . ?
C2 C3 1.381(6) . ?
C10 C9 1.373(7) . ?
C10 C11 1.382(8) . ?
C10 H10 0.9300 . ?
C3 C6 1.453(7) . ?
C6 C7 1.346(7) . ?
C6 H6 0.9300 . ?
C7 C8 1.466(7) . ?
C7 H7 0.9300 . ?
C9 C8 1.400(7) . ?
C9 H9 0.9300 . ?
C11 H11 0.9300 . ?
 
loop_
 _geom_angle_atom_site_label_1
 _geom_angle_atom_site_label_2
 _geom_angle_atom_site_label_3
 _geom_angle
 _geom_angle_site_symmetry_1
 _geom_angle_site_symmetry_3
 _geom_angle_publ_flag
C11 C12 C13 119.4(5) . . ?
C11 C12 H12 120.3 . . ?
C13 C12 H12 120.3 . . ?
C12 C13 C8 121.0(5) . . ?
C12 C13 H13 119.5 . . ?
C8 C13 H13 119.5 . . ?
C2 S3 C5 90.5(2) . . ?
C5 C4 C3 112.6(4) . . ?
C5 C4 H4 123.7 . . ?
C3 C4 H4 123.7 . . ?
C3 C2 S3 114.0(4) . . ?
C3 C2 Br2 126.5(4) . . ?
S3 C2 Br2 119.5(3) . . ?
C9 C10 C11 120.6(5) . . ?
C9 C10 H10 119.7 . . ?
C11 C10 H10 119.7 . . ?
C4 C5 S3 112.7(3) . . ?
C4 C5 Br1 127.1(3) . . ?
S3 C5 Br1 120.1(3) . . ?
C2 C3 C6 124.6(4) . . ?
C2 C3 C4 110.2(4) . . ?
C6 C3 C4 125.2(4) . . ?
C7 C6 C3 124.3(4) . . ?
C7 C6 H6 117.9 . . ?
C3 C6 H6 117.9 . . ?
C6 C7 C8 126.2(4) . . ?
C6 C7 H7 116.9 . . ?
C8 C7 H7 116.9 . . ?
C10 C9 C8 120.9(4) . . ?
C10 C9 H9 119.5 . . ?
C8 C9 H9 119.5 . . ?
C9 C8 C13 118.0(4) . . ?
C9 C8 C7 123.1(4) . . ?
C13 C8 C7 118.9(4) . . ?
C12 C11 C10 120.0(5) . . ?
C12 C11 H11 120.0 . . ?
C10 C11 H11 120.0 . . ?
 
loop_
 _geom_torsion_atom_site_label_1
 _geom_torsion_atom_site_label_2
 _geom_torsion_atom_site_label_3
 _geom_torsion_atom_site_label_4
 _geom_torsion
 _geom_torsion_site_symmetry_1
 _geom_torsion_site_symmetry_2
 _geom_torsion_site_symmetry_3
 _geom_torsion_site_symmetry_4
 _geom_torsion_publ_flag
C11 C12 C13 C8 -0.9(8) . . . . ?
C5 S3 C2 C3 0.3(4) . . . . ?
C5 S3 C2 Br2 179.3(3) . . . . ?
C3 C4 C5 S3 0.1(6) . . . . ?
C3 C4 C5 Br1 178.3(3) . . . . ?
C2 S3 C5 C4 -0.2(4) . . . . ?
C2 S3 C5 Br1 -178.6(3) . . . . ?
S3 C2 C3 C6 -179.6(4) . . . . ?
Br2 C2 C3 C6 1.5(7) . . . . ?
S3 C2 C3 C4 -0.3(5) . . . . ?
Br2 C2 C3 C4 -179.2(4) . . . . ?
C5 C4 C3 C2 0.1(6) . . . . ?
C5 C4 C3 C6 179.4(4) . . . . ?
C2 C3 C6 C7 -174.7(5) . . . . ?
C4 C3 C6 C7 6.1(8) . . . . ?
C3 C6 C7 C8 -177.7(4) . . . . ?
C11 C10 C9 C8 -0.9(8) . . . . ?
C10 C9 C8 C13 1.3(7) . . . . ?
C10 C9 C8 C7 -179.6(4) . . . . ?
C12 C13 C8 C9 -0.4(7) . . . . ?
C12 C13 C8 C7 -179.6(5) . . . . ?
C6 C7 C8 C9 -2.4(8) . . . . ?
C6 C7 C8 C13 176.7(5) . . . . ?
C13 C12 C11 C10 1.3(8) . . . . ?
C9 C10 C11 C12 -0.4(8) . . . . ?
 
_diffrn_measured_fraction_theta_max    0.924
_diffrn_reflns_theta_full              27.50
_diffrn_measured_fraction_theta_full   0.998
_refine_diff_density_max    1.976
_refine_diff_density_min   -1.142
_refine_diff_density_rms    0.168
